# Supplementary material for: Short- and Long-Term Evaluation of a Fixed Dose of Beauveria bassiana Strain MS-8 Diluted in Various Doses of Kaolin as a Powder Formulation Applied to Rice Grains to Control Almond Moth, Ephestia cautella Walker (Lepidoptera: Pyralidae)
Source: MDPI journal article supplement (doi:10.3390/microorganisms10101971), 2022-10-05
Supplement: s1 [file s1]

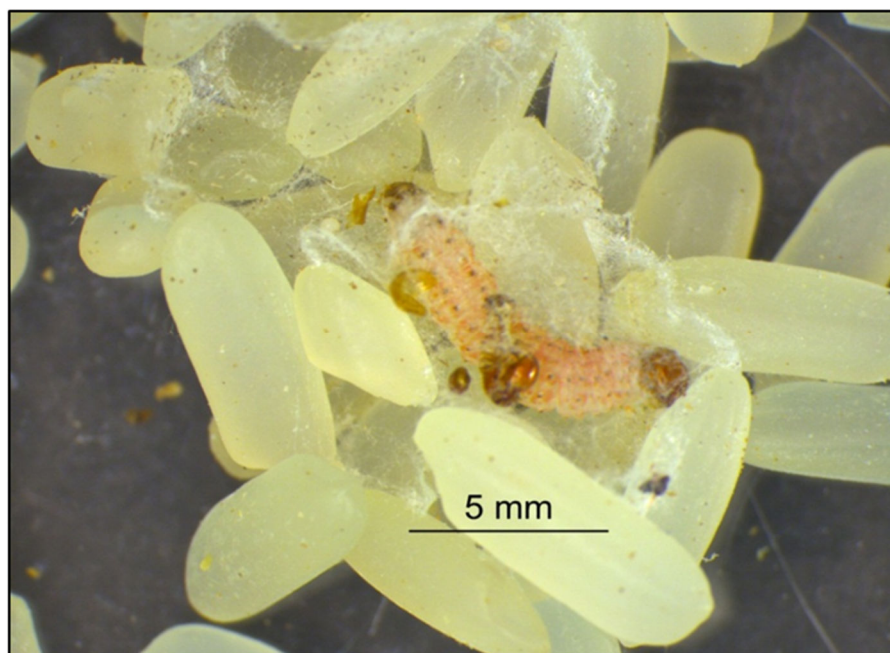

**Figure S1.** Webs made by *Ephestia cautella* larvae to avoid hostile conditions, following treatment of rice grain with *Beauveria bassiana* MS-8 at a kaolin dose of 2g kg<sup>-1</sup> of grain

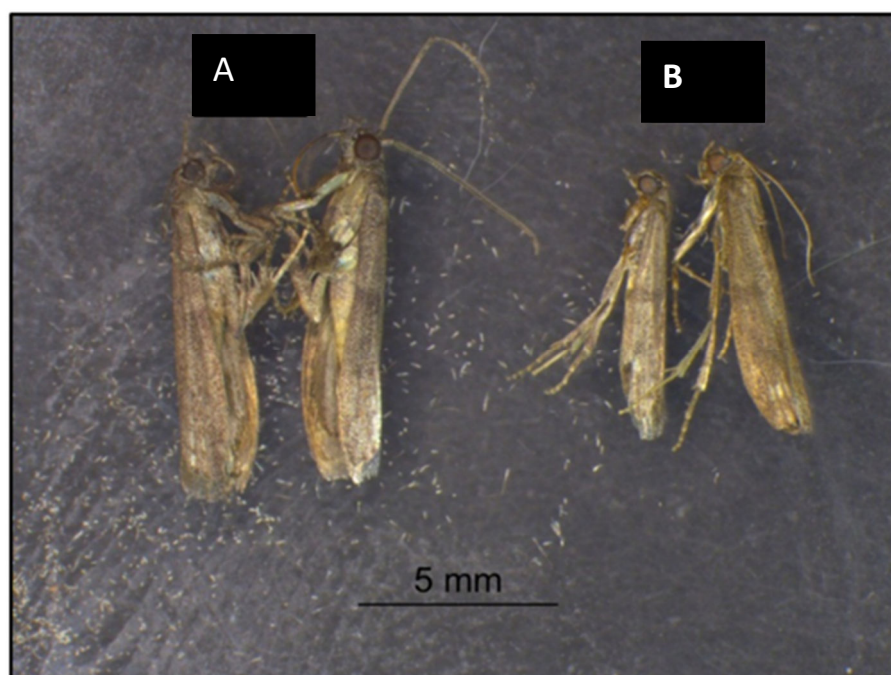

**Figure S2.** A= *Ephestia cautella* adults that emerged from untreated rice grain; B = adults that emerged from rice grains, following treatment with *Beauveria bassiana* MS-8 at a kaolin dose of 2g kg<sup>-1</sup> of grain, showing the difference in size
